# Supplementary material for: Silencing LGR6 Attenuates Stemness and Chemoresistance via Inhibiting Wnt/β-Catenin Signaling in Ovarian Cancer
Source: PubMed Central journal article supplement (PMC6517611; doi:10.1016/j.omto.2019.04.002), 2019-04-19
Supplement: mmc1.pdf [file mmc1.pdf]

OMTO, Volume 14

## Supplemental Information

### **Silencing LGR6 Attenuates Stemness and Chemoresistance via Inhibiting Wnt/ $\beta$ -Catenin Signaling in Ovarian Cancer**

**Xiaohong Ruan, Aibin Liu, Meigong Zhong, Jihong Wei, Weijian Zhang, Yingrou Rong, Wanmin Liu, Mingwei Li, Xingrong Qing, Gaowen Chen, Ronggang Li, Yuehua Liao, Qiongru Liu, Xin Zhang, Dong Ren, and Yifeng Wang**

**Supplemental Table 1. The basic information of 40 patients with normal ovarian control for LGR6 immunohistochemical staining analysis.**

|                  |                                                  | Cases (n, %) |
|------------------|--------------------------------------------------|--------------|
| Age              | <50                                              | 11 (27.5)    |
|                  | ≥50                                              | 29 (72.5)    |
| Type of diseases | Malignant lesions on the contralateral ovary     | 1 (2.5)      |
|                  | Non-malignant lesions on the contralateral ovary | 13 (32.5)    |
|                  | Malignant lesions without ovary                  | 5 (12.5)     |
|                  | Non-malignant lesions without ovary              | 21 (52.5)    |

Note: (1) Malignant lesions on the contralateral ovary included endometrioid adenocarcinoma. (2) Non-malignant lesions on the contralateral ovary included simple cyst, Brenner tumor, serous cystadenoma and fibrothecoma. (3) Malignant lesions without ovary included breast cancer, cervical cancer and uterus cancer. (4) Non-malignant lesions without ovary included cervical intraepithelial neoplasia, mesosalpinx cyst, uterine fibroids, endometrial hyperplasia with atypia and prolapse of uterus.

**Supplemental Table 2. The basic information of 294 patients with epithelial ovarian cancer for LGR6 immunohistochemical staining analysis.**

|                                         |                                  | Cases (n) | Percentage (%) |
|-----------------------------------------|----------------------------------|-----------|----------------|
| Age                                     | <50                              | 128       | 43.5           |
|                                         | ≥50                              | 166       | 56.5           |
| Histologic                              | Low grade serous adenocarcinoma  | 27        | 9.2            |
|                                         | High grade serous adenocarcinoma | 162       | 55.1           |
|                                         | Mucinous adenocarcinoma          | 42        | 14.3           |
|                                         | Endometrioid adenocarcinoma      | 29        | 9.9            |
|                                         | Clear cell adenocarcinoma        | 16        | 5.4            |
|                                         | Other                            | 18        | 6.1            |
| FIGO stage                              | Stage I                          | 90        | 30.6           |
|                                         | Stage II                         | 49        | 16.7           |
|                                         | Stage III                        | 130       | 44.2           |
|                                         | Stage IV                         | 12        | 4.1            |
|                                         | NA                               | 13        | 4.4            |
| Progression status<br>(in 3 y)          | Positive                         | 91        | 31.0           |
|                                         | Negative                         | 54        | 18.4           |
|                                         | NA                               | 149       | 50.7           |
| First chemotherapy<br>response (at 6 m) | Sensitivity                      | 63        | 21.4           |
|                                         | Resistance                       | 30        | 10.2           |
|                                         | NA                               | 201       | 68.4           |

Note: (1) Other histologic types included mixed adenocarcinoma, serous-mucinous adenocarcinoma, undifferentiated carcinoma, carcinosarcoma and non-specific type adenocarcinoma. (2) NA: Not available; FIGO: The International Federation of Gynecology and Obstetrics.

**Supplemental Table 3. The relationship between LGR6 IHC expression level and clinical pathological characteristics in 294 patients with epithelial ovarian cancer.**

| Parameters                              | Number of cases | LGR6 IHC expression |      | P values |
|-----------------------------------------|-----------------|---------------------|------|----------|
|                                         |                 | Low                 | High |          |
| Age                                     |                 |                     |      |          |
| <50                                     | 128             | 55                  | 63   | 0.705    |
| ≥50                                     | 166             | 86                  | 90   |          |
| Histologic                              |                 |                     |      |          |
| Type I                                  | 114             | 68                  | 46   | <0.001   |
| Type II                                 | 164             | 62                  | 102  |          |
| FIGO stage                              |                 |                     |      |          |
| I – II                                  | 139             | 84                  | 55   | <0.001   |
| III - IV                                | 142             | 49                  | 93   |          |
| Progression status<br>(in 3 y)          |                 |                     |      |          |
| Positive                                | 91              | 20                  | 70   | 0.004    |
| Negative                                | 54              | 24                  | 29   |          |
| First chemotherapy<br>response (at 6 m) |                 |                     |      |          |
| Sensitivity                             | 63              | 39                  | 24   | <0.001   |
| Resistance                              | 30              | 2                   | 28   |          |

Note: (1) Histologic type I included low grade serous adenocarcinoma, mucinous adenocarcinoma, endometrioid adenocarcinoma and clear cell adenocarcinoma. Histologic type II included high grade serous adenocarcinoma and undifferentiated carcinoma. (2) IHC: Immunohistochemistry; FIGO: The International Federation of Gynecology and Obstetrics.

**Supplemental Table 4. A list of primers used in the reactions for real-time PCR.**

| Gene name |         | Sequence                          |
|-----------|---------|-----------------------------------|
| ABCG2     | forward | 5'- ATGAACACACATGTGCAACCATC -3'   |
|           | reverse | 5'- CACAGAAACACAACACTTGGCTGTA -3' |
| CCND1     | forward | 5'- CGTGGCCTCTAAGATGAAGG -3'      |
|           | reverse | 5'- CCACTTGAGCTTGTTACCA -3'       |
| CDH1      | forward | 5'- ATGAGTGTCCCCCGGTATCT -3'      |
|           | reverse | 5'- GGCTGTGGGGTCAGTATCAG -3'      |
| DKK3      | forward | 5'- GTGCTGTGCCTTCCAGAGA -3'       |
|           | reverse | 5'- GCTCTAGCTCCCAGGTGATG -3'      |
| GAPDH     | forward | 5'- GCACCGTCAAGGCTGAGAAC -3'      |
|           | reverse | 5'- TGGTGAAGACGCCAGTGGA -3'       |
| KLF4      | forward | 5'- GTTCCCATCTCAAGGCACAC -3'      |
|           | reverse | 5'- ACGGTAGTGCCTGGTCAGTT -3'      |
| LEF1      | forward | 5'- CCATCCCGAGAACATCAAAT -3'      |
|           | reverse | 5'- CCTGGAGAAAAGTGCTCGTC -3'      |
| LGR4      | forward | 5'- TGATGCAGCAAATGTCACAA -3'      |
|           | reverse | 5'- GGGCTTAAAAGCACCTGTTG -3'      |
| LGR5      | forward | 5'- TGAATTTGGCTTGGAACAAA -3'      |
|           | reverse | 5'- AAAGACGACAGGAGGTTGGA -3'      |
| LGR6      | forward | 5'- AAGGGAACCTTGCTCTCTCC -3'      |
|           | reverse | 5'- CATCCCATAGGGACAGCACT -3'      |
| MMP7      | forward | 5'- TGTATGGGGAAGTCTGACA -3'       |
|           | reverse | 5'- ATCTCCTCCGAGACCTGTCC -3'      |
| NANOG     | forward | 5'- TCCAACATCCTGAACCTCAGCTA -3'   |
|           | reverse | 5'- AGTCGGGTTCCACCAGGCATC -3'     |
| OCT4      | forward | 5'- TGAAGCTGGAGAAGGAGAAGCTG -3'   |
|           | reverse | 5'- GCAGATGGTCGTTTGGCTGA -3'      |
| SOX2      | forward | 5'- GTGAGCGCCCTGCAGTACAA -3'      |
|           | reverse | 5'- GCGAGTAGGACATGCTGTAGGTG -3'   |
| TCF1      | forward | 5'- ACCTGTCCCAACACCTCAAC -3'      |
|           | reverse | 5'- CTCATCACCTGTGGGCTCTT -3'      |
| VEGFA     | forward | 5'- AGACCCTGGTGGACATCTTC -3'      |
|           | reverse | 5'- ATCCGCATAATCTGCATGGT -3'      |

**Supplemental Table 5. A list of primers used in the reactions for clone PCR.**

| Gene name |         | Sequence                                                               |
|-----------|---------|------------------------------------------------------------------------|
| shLGR6:#1 | forward | 5'- CCGG-GAGGGAAGTAAAGACAGTGAA-CTCGAG-TTCACTGTCTTTACTTCCCTC-TTTTTG -3' |
|           | reverse | 5'-CAAAAA-GAGGGAAGTAAAGACAGTGAA-CTCGAG-TTCACTGTCTTTACTTCCCTC-CCGG-3'   |
| shLGR6:#2 | forward | 5'- CCGG-GCATTCCAGTACCTGCCTAAA-CTCGAG-TTTAGGCAGGTACTGGAATGC-TTTTTG -3' |
|           | reverse | 5'- CAAAAA-GCATTCCAGTACCTGCCTAAA-CTCGAG-GCATTCCAGTACCTGCCTAAA-CCGG-3'  |

**Supplemental Table 6. The basic information of 6 epithelial ovarian cancer patients and 4 normal ovarian control patients for LGR6 mRNA and protein expression analysis.**

|         |                                  | Cases (n, %) |          |
|---------|----------------------------------|--------------|----------|
|         |                                  | EOC          | NC       |
| Age     | ≤50                              | 3 (50.0)     | 2 (50.0) |
|         | >50                              | 3 (50.0)     | 2 (50.0) |
| Disease | Low grade serous adenocarcinoma  | 1 (16.7)     | 0        |
|         | High grade serous adenocarcinoma | 2 (33.3)     | 0        |
|         | Mucinous adenocarcinoma          | 1 (16.7)     | 0        |
|         | Endometrioid adenocarcinoma      | 1 (16.7)     | 0        |
|         | Clear cell adenocarcinoma        | 1 (16.7)     | 0        |
|         | Cervical adenocarcinoma          | 0            | 2 (50.0) |
|         | Endometrial adenocarcinoma       | 0            | 1 (50.0) |
|         | Cervical squamous carcinoma      | 0            | 1 (50.0) |

Note: EOC: epithelial ovarian cancer; NC: normal control.
